# Supplementary material for: Synthesis of a biocompatible nanoporous zeolitic imidazolate framework-8 in the presence of Gum Arabic inspired by the biomineralization process
Source: Royal Society of Chemistry journal article supplement (doi:10.1039/c9ce01915d), 2020-01-01
Supplement: c9ce01915d1.pdf [file c9ce01915d1.pdf]

## **Synthesis of Biocompatible Nanoporous Zeolitic imidazolate Framework-8 in the Presence of Gum Arabic Inspired by the Biomineralization Process**

Fatemeh Khalilian,<sup>a</sup> Maryam Tohidi,<sup>a\*</sup> and Banafsheh Rastegari<sup>b</sup>

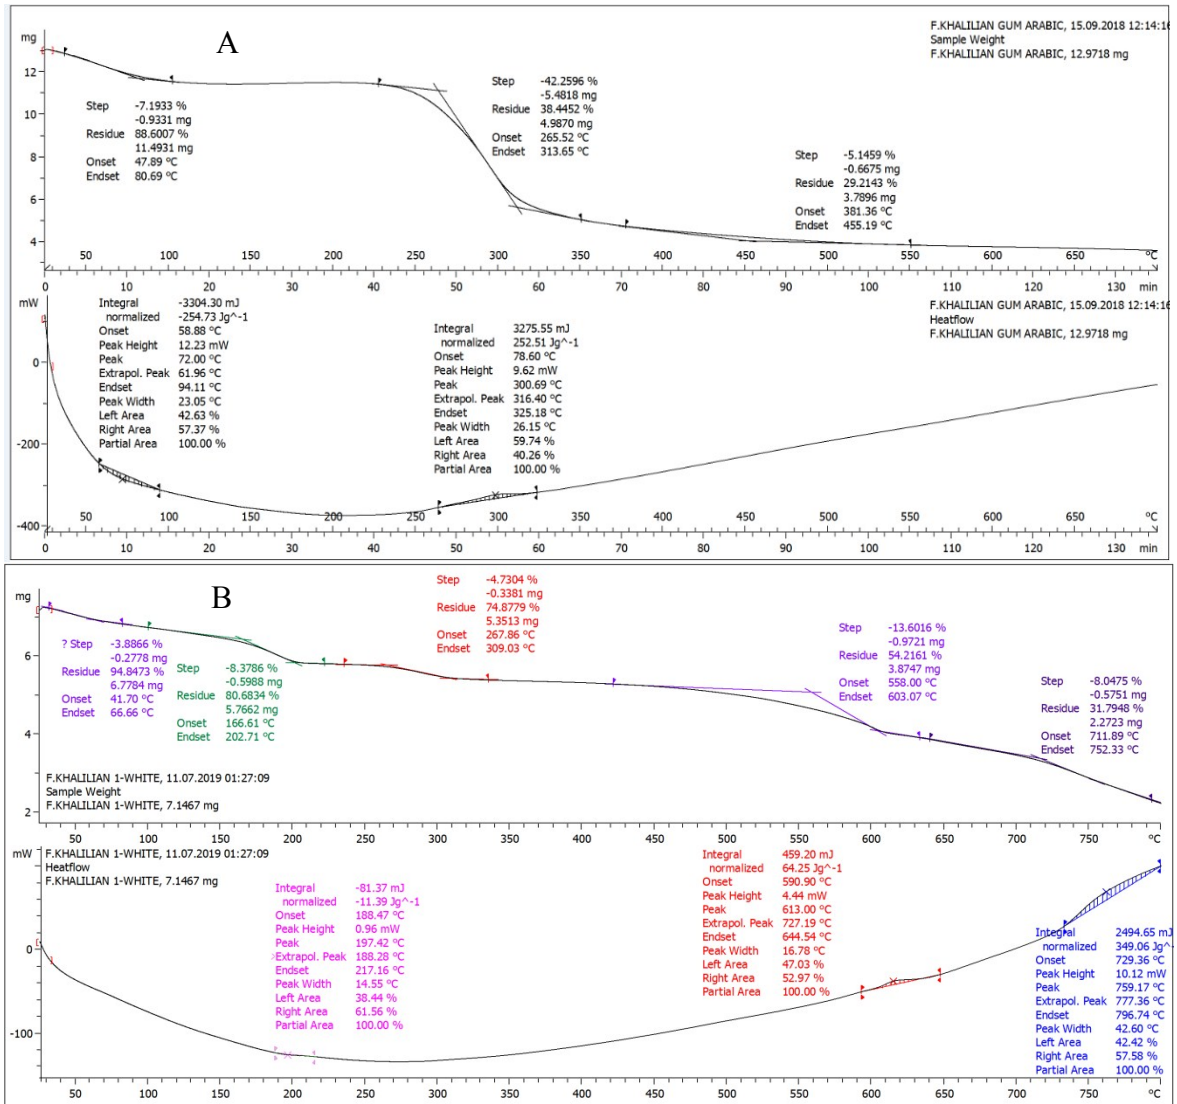

Fig.S1. TGA platforms of mass loss of (A) GA and (B) ZIF-8-GA versus temperature.

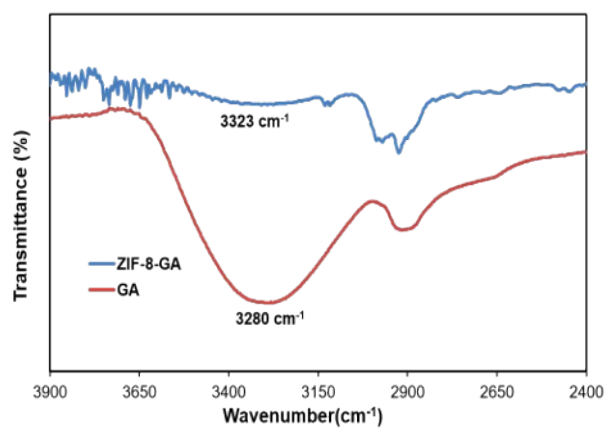

Fig.S2. FTIR analysis of ZIF-8-GA(blue) and GA (red). The hydroxyl groups of GA in ZIF-8-GA were shifted to the higher wavenumbers that verified the encapsulation of GA in the ZIF-8-GA framework.
